# Supplementary material for: Ginsenoside Rb1 Improves Post-Cardiac Arrest Myocardial Stunning and Cerebral Outcomes by Regulating the Keap1/Nrf2 Pathway
Source: MDPI journal article supplement (doi:10.3390/ijms24055059), 2023-03-06
Supplement: s1 [file s1]

| Supplemental Table S1. Primers for PCR |                                         |
|----------------------------------------|-----------------------------------------|
| NPCR production                        | Oligoes for mutations (forward/reverse) |
| Mouse Nrf2                             | CCATGTGTGGCAGTCCATGAT                   |
|                                        | GCAGGCATACCATTGTGGAT                    |
| Rat Nrf2                               | GGTTGCCCACATTCCCAAAC                    |
|                                        | CAGGGCAAGCGACTGAAATG                    |
